# Supplementary material for: Muscleblind-like 3 deficit results in a spectrum of age-associated pathologies observed in myotonic dystrophy
Source: PubMed Central journal article supplement (PMC4971533; doi:10.1038/srep30999), 2016-08-03
Supplement: srep30999-s1.pdf [file srep30999-s1.pdf]

**Muscleblind-like protein 3 deficit results in a spectrum of age-associated pathologies  
observed in myotonic dystrophy**

*Jongkyu Choi<sup>1, \*</sup>, Donald M. Dixon<sup>1, \*</sup>, Warunee Dansithong<sup>1, 2, \*</sup>, Walid F. Abdallah<sup>3</sup>, Kenneth P. Roos<sup>4</sup>, Maria C. Jordan<sup>4</sup>, Brandon Trac<sup>1</sup>, Han Shin Lee<sup>1</sup>, Lucio Comai<sup>5</sup>, Sita Reddy<sup>1</sup>*

<sup>1</sup>Department of Biochemistry and Molecular Biology, University of Southern California, Los Angeles, CA 90033, USA; <sup>2</sup>Current address: Department of Neurology, Clinical Neurosciences Center, University of Utah, Salt Lake City, UT 84132, USA; <sup>3</sup>USC Eye Institute, Los Angeles, CA 90033, USA and Department of Ophthalmology, Faculty of Medicine, Zagazig University, Zagazig, Egypt; <sup>4</sup>Department of Physiology, David Geffen School of Medicine at UCLA, Los Angeles, CA 90095-1751, USA. <sup>5</sup>Department of Microbiology and Immunology, University of Southern California, Los Angeles, CA 90033, USA.

\* These authors contributed equally to the study.

Address correspondence to Sita Reddy at Institute for Genetic Medicine, CSC-240, Keck School of Medicine, University of Southern California, 2250 Alcazar Street, Los Angeles, CA 90033, USA. Email: sitaredd@usc.edu

Running Title: Age-associated pathologies in *Mbnl3* deficient mice

## SUPPLEMENTARY FIGURE AND TABLE LEGENDS

### Supplementary Fig. S1. RT-PCR analysis of *Mbnl3* expression in adult mouse tissues.

RNA samples from 129Sv *Mbnl3*<sup>+/+</sup> and 129Sv *Mbnl3*<sup>ΔE2</sup> E18 placenta and the indicated adult tissues/organs were subjected to RT-PCR (40 cycles) using primers located in *Mbnl3* exon 2.

### Supplementary Fig. S2. Splicing analysis in *Mbnl3*<sup>ΔE2</sup> soleus muscle and heart.

**a.** *Insr* exon 10a inclusion was not significantly different in *Mbnl3*<sup>+/+</sup> and *Mbnl3*<sup>ΔE2</sup> muscles at 7 months of age. Alternative splicing was analyzed for *Insr* by RT-PCR in male *Mbnl3*<sup>+/+</sup> and male *Mbnl3*<sup>ΔE2</sup> soleus muscles at 7 months of age. Band intensities were quantitated by densitometry. **b.** Splicing analyses for *Ldb3*, *Tnnt2*, *Insr* and *Mbnl1* performed by RT-PCR in male *Mbnl3*<sup>+/+</sup> and male *Mbnl3*<sup>ΔE2</sup> hearts at 7 months of age. *Tnnt2* exon 4 + 5, *Insr* exon 10a and *Mbnl1* exon 7 inclusion was not significantly different in *Mbnl3*<sup>+/+</sup> and *Mbnl3*<sup>ΔE2</sup> hearts at 7 months of age. *Ldb3* exon 11 inclusion in *Mbnl3*<sup>ΔE2</sup> hearts was significantly decreased when compared to *Mbnl3*<sup>+/+</sup> hearts at 7 months of age. **c.** *Mbnl1* exon 7 and *Insr* exon 10a inclusion was not significantly different in male *Mbnl3*<sup>+/+</sup> and *Mbnl3*<sup>ΔE2</sup> hearts at 11 months of age. Alternative splicing was analyzed for *Mbnl1* and *Insr* by RT-PCR in male *Mbnl3*<sup>+/+</sup> and male *Mbnl3*<sup>ΔE2</sup> hearts at 11 months of age. Band intensities were quantitated by densitometry. The exon numbers are indicated and the alternatively spliced exons are shown as a gray box. Exon numbers are annotated based on Refseq from UCSC genome browser (NCBI37/mm9). The expected band sizes and p-values are shown. Data are standard error of mean.

### Supplementary Fig. S3. Splicing analysis in *Mbnl3*<sup>ΔE2</sup> hearts at 11 months of age.

Splicing analyses for *Pdlim3/Alp*, *Trim55/Murf2*, *Mapt/Tau*, *Pdlim5*, *Sorbs1*, *Sorbs2*, *Fhod1*, *Spag9*, *Mbnl2*, *Myom1*, *Clta*, *Stx2*, *Csda*, *Sirt2*, *Atp2a1*, *Atp11a* and *Gapdh* were performed by RT-PCR in male *Mbnl3*<sup>+/+</sup> and male *Mbnl3*<sup>ΔE2</sup> hearts (n=3/genotype) at 11 months of age and E18 *Mbnl3*<sup>+/+</sup> hearts. Band intensities were quantitated by densitometry. The exon numbers are indicated and the alternatively spliced exons are shown as a green box. Exon numbers are annotated based on Refseq from UCSC genome browser (NCBI37/mm9). The expected band sizes and p-values are shown. Data are standard error of mean.

**Supplementary Fig. S4. Splicing analysis in *Mbnl3*<sup>ΔE2</sup> soleus muscles at 11 months of age.**

Splicing analyses for *Pdlim3/Alp*, *Trim55/Murf2*, *Mapt/Tau*, *Pdlim5*, *Sorbs1*, *Sorbs2*, *Fhod1*, *Spag9*, *Mbnl2*, *Myom1*, *Clta*, *Stx2*, *Csda*, *Sirt2*, *Atp2a1*, *Atp11a* and *Gapdh* were performed by RT-PCR in male *Mbnl3*<sup>+/+</sup> and male *Mbnl3*<sup>ΔE2</sup> soleus muscles (n=3/genotype) at 11 months of age and E18 *Mbnl3*<sup>+/+</sup> forelimbs. Band intensities were quantitated by densitometry. The exon numbers are indicated and the alternatively spliced exons are shown as a green box. Exon numbers are annotated based on Refseq from UCSC genome browser (NCBI37/mm9). The expected band sizes and p-values are shown. Data are standard error of mean.

**Supplementary Fig. S5. Splicing analysis in *Mbnl3*<sup>ΔE2</sup> whole lens at 8 months of age.**

Splicing analyses for *Mapt/Tau*, *Pdlim5*, *Sorbs1*, *Sorbs2*, *Spag9*, *Mbnl2*, *Stx2*, *Csda*, *Sirt2*, *Atp11a* and *Gapdh* were performed by RT-PCR in the whole lens from male *Mbnl3*<sup>+/+</sup> and male *Mbnl3*<sup>ΔE2</sup> mice (n=3/genotype) at 8 months of age and E18 *Mbnl3*<sup>+/+</sup> mice. Band intensities were quantitated by densitometry. The exon numbers are indicated and the alternatively spliced exons are shown as a green box. Exon numbers are annotated based on Refseq from UCSC genome

browser (NCBI37/mm9). The expected band sizes and p-values are shown. Data are standard error of mean.

**Supplementary Table S1. a & b.** Blood glucose levels (mg/dL) subsequent to dextrose injection at time 0 for male *Mbnl3*<sup>+/+</sup> and male *Mbnl3*<sup>AE2</sup> mice at 4 and 7-9 months of age are shown. p-values were calculated using the Student's t-test with significance set at  $p \leq 0.05$ . Values where  $p \leq 0.05$  are shown in red. Data are standard error of mean.

**Supplementary Table S2.** Blood insulin levels (ng/ml) subsequent to dextrose injection at time 0 for male *Mbnl3*<sup>+/+</sup> and male *Mbnl3*<sup>AE2</sup> mice at 8-10 months of age are shown. p-values were calculated using the Student's t-test with significance set at  $p \leq 0.05$ . Values where  $p \leq 0.05$  are shown in red. Data are standard error of mean.

**Supplementary Table S3. a & b.** Ultrasound echocardiographic values recorded from male *Mbnl3*<sup>+/+</sup> and male *Mbnl3*<sup>AE2</sup> mice at 4 months and 11 months of age are shown. Measurements of the left ventricle taken in this study include ventricular septal thickness (VST), end-diastolic dimension (EDD), posterior wall thickness (PWT), end-systolic dimension (ESD), and left ventricle mass (Lv<sub>mass</sub>). Heart function assessments included aorta ejection time (Ao-ET), left ventricle percent fractional shortening (Lv<sup>0</sup>%FS), velocity of circumferential fiber shortening (V<sub>cf</sub>), left ventricle ejection fraction (LvEF) and the E/A ratio. Data are mean and standard deviation. p-values were calculated using the Student's t-test with significance set at  $p \leq 0.05$ . Values where  $p \leq 0.05$  are shown in red.

**Supplementary Table S4. a & b.** EKG values for male *Mbnl3*<sup>+/+</sup> and male *Mbnl3*<sup>ΔE2</sup> mice at 4 and 11 months of age are shown. Data are mean and standard deviation. p-values were calculated using the Student's t-test with significance set at  $p \leq 0.05$ .

**Supplementary Table S5.** Electroretinography values for male *Mbnl3*<sup>+/+</sup> and male *Mbnl3*<sup>ΔE2</sup> mice at 13 months of age are shown. Data are mean and standard deviation. p-values were calculated using the Student's t-test with significance set at  $p \leq 0.05$ .

**Supplementary Table S6.** PCR conditions and primers.

Figure S1

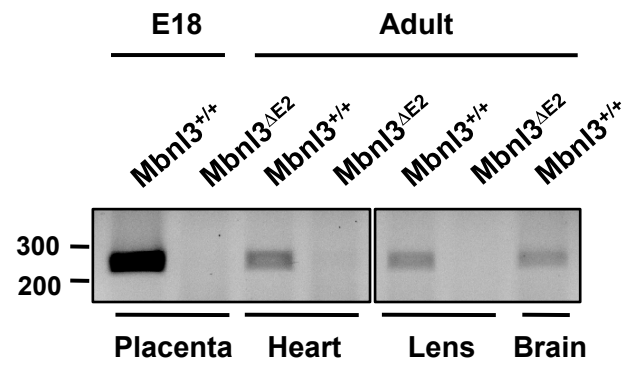

Figure S2

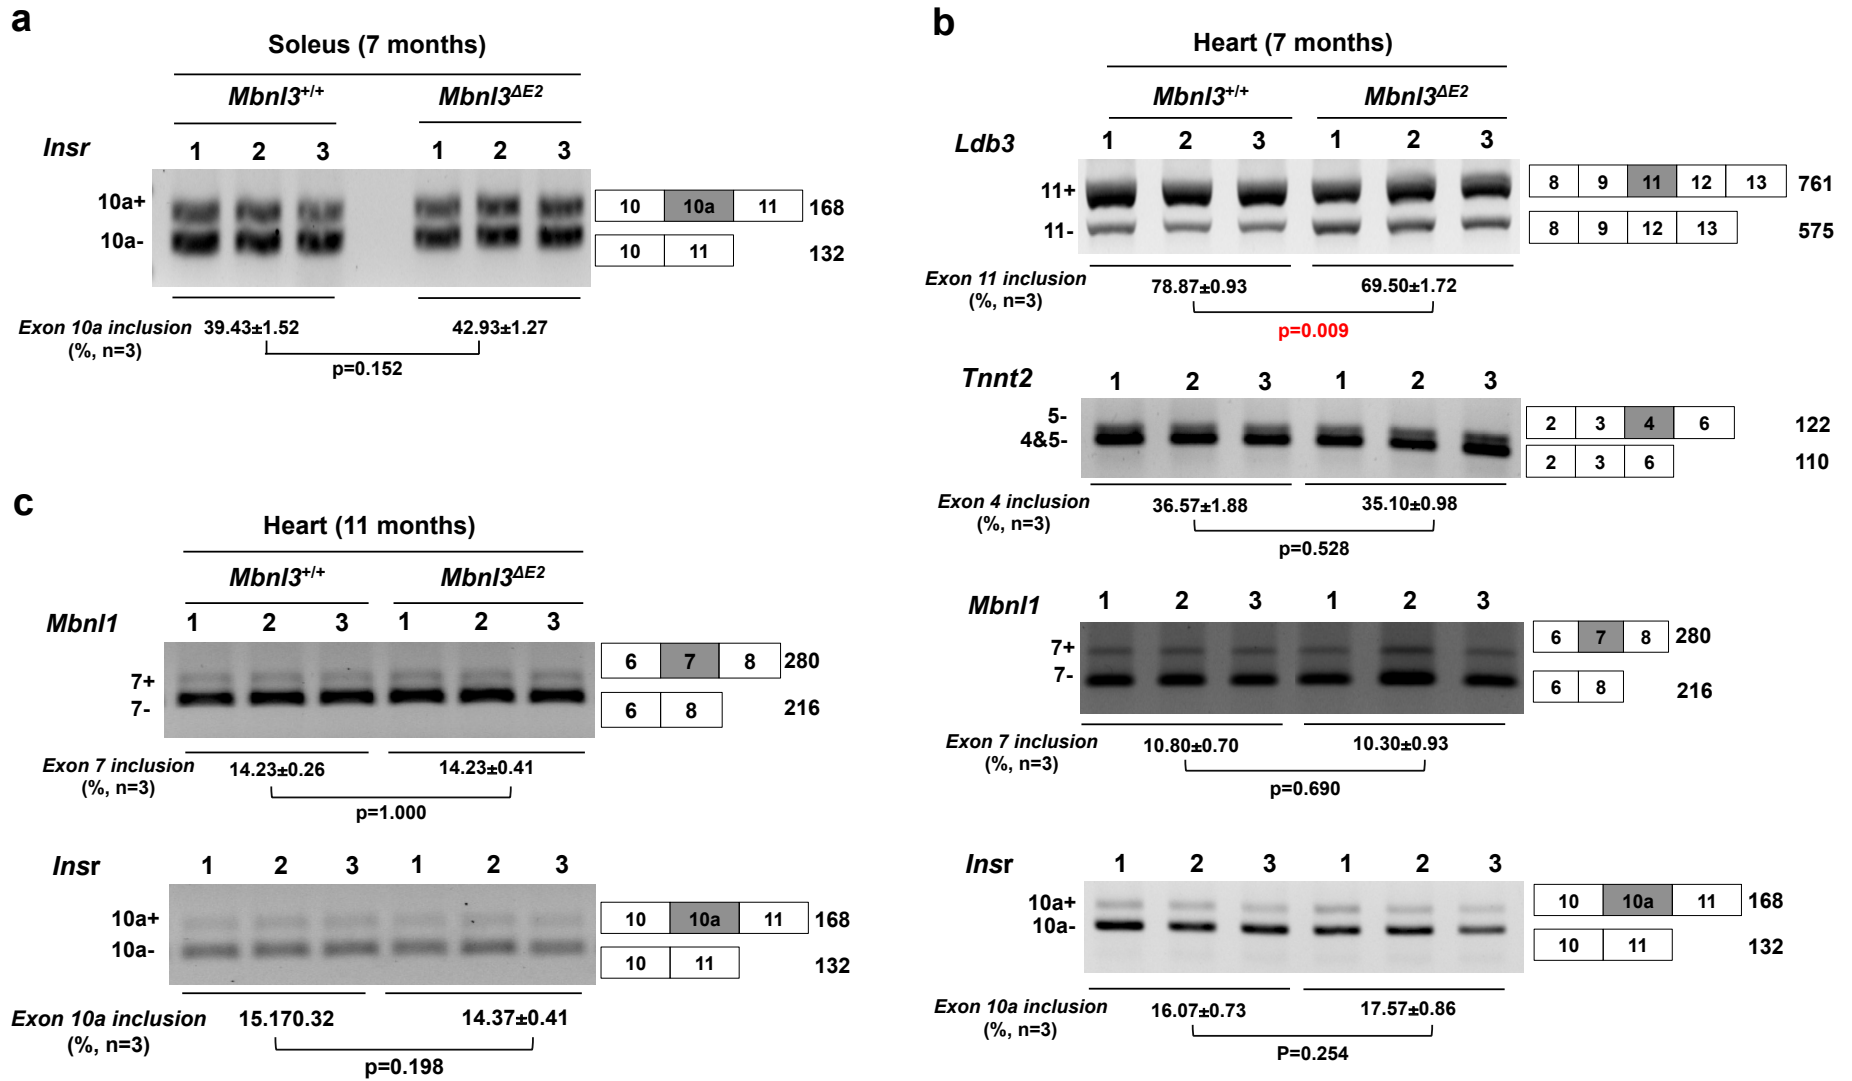

Figure S3

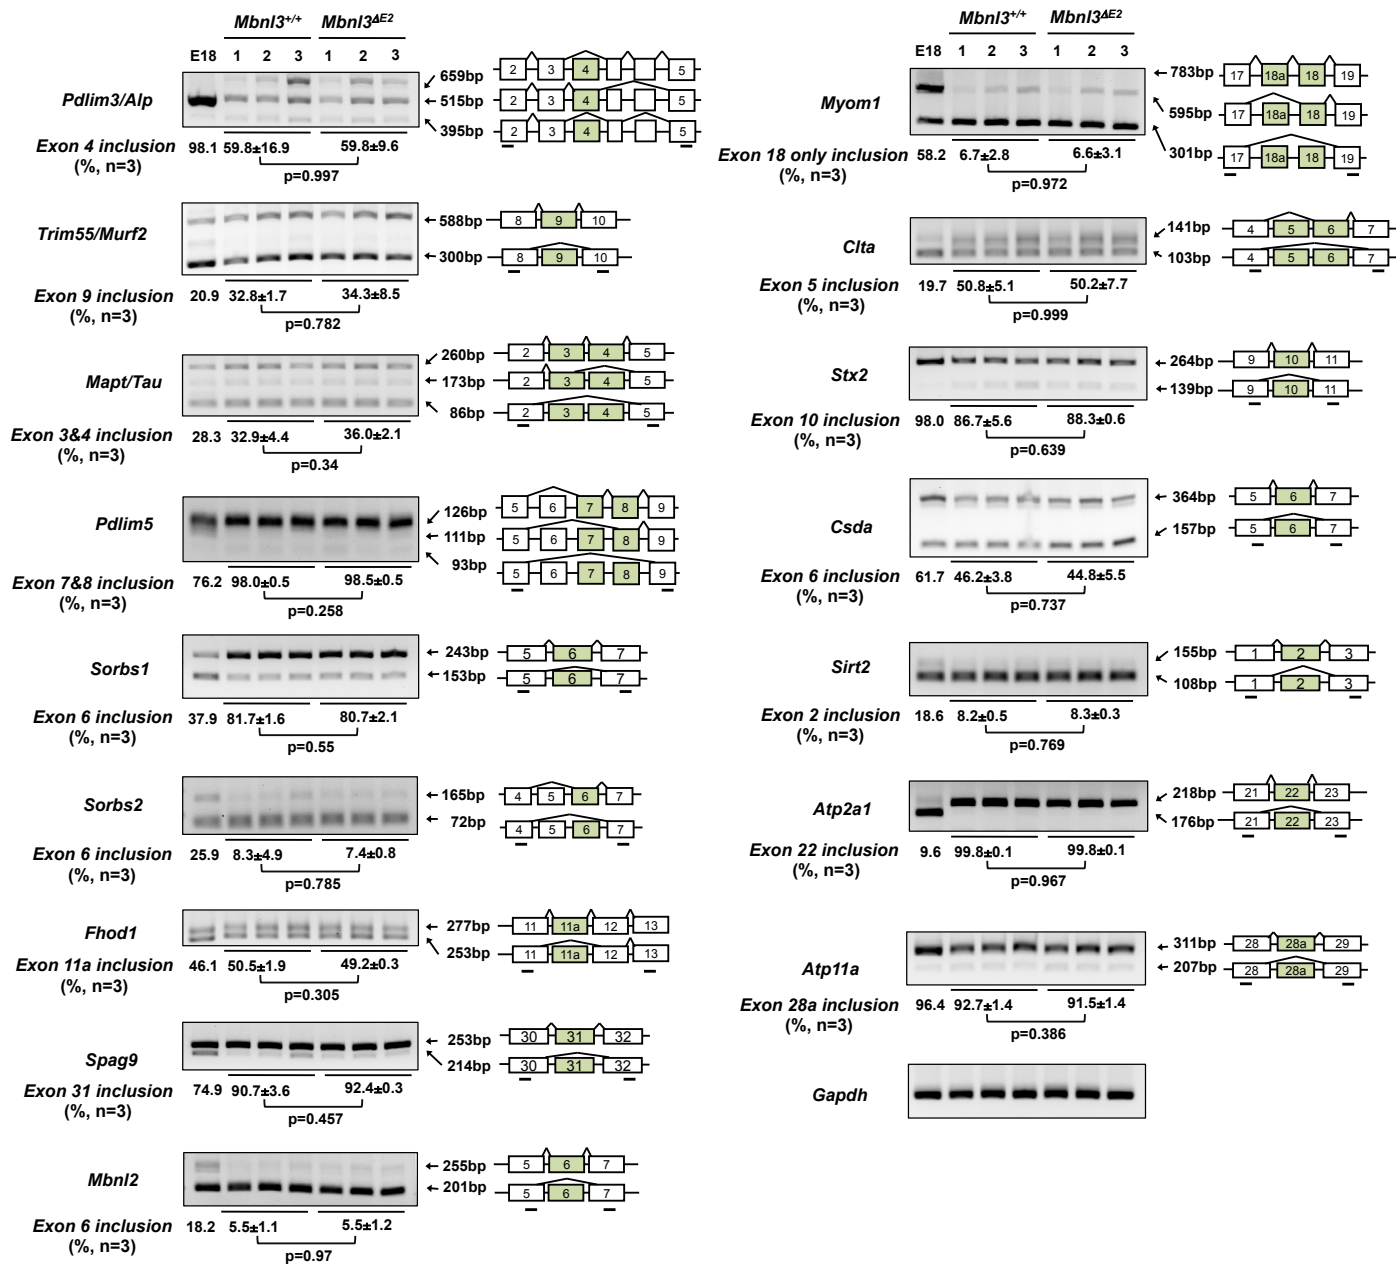





Figure S5

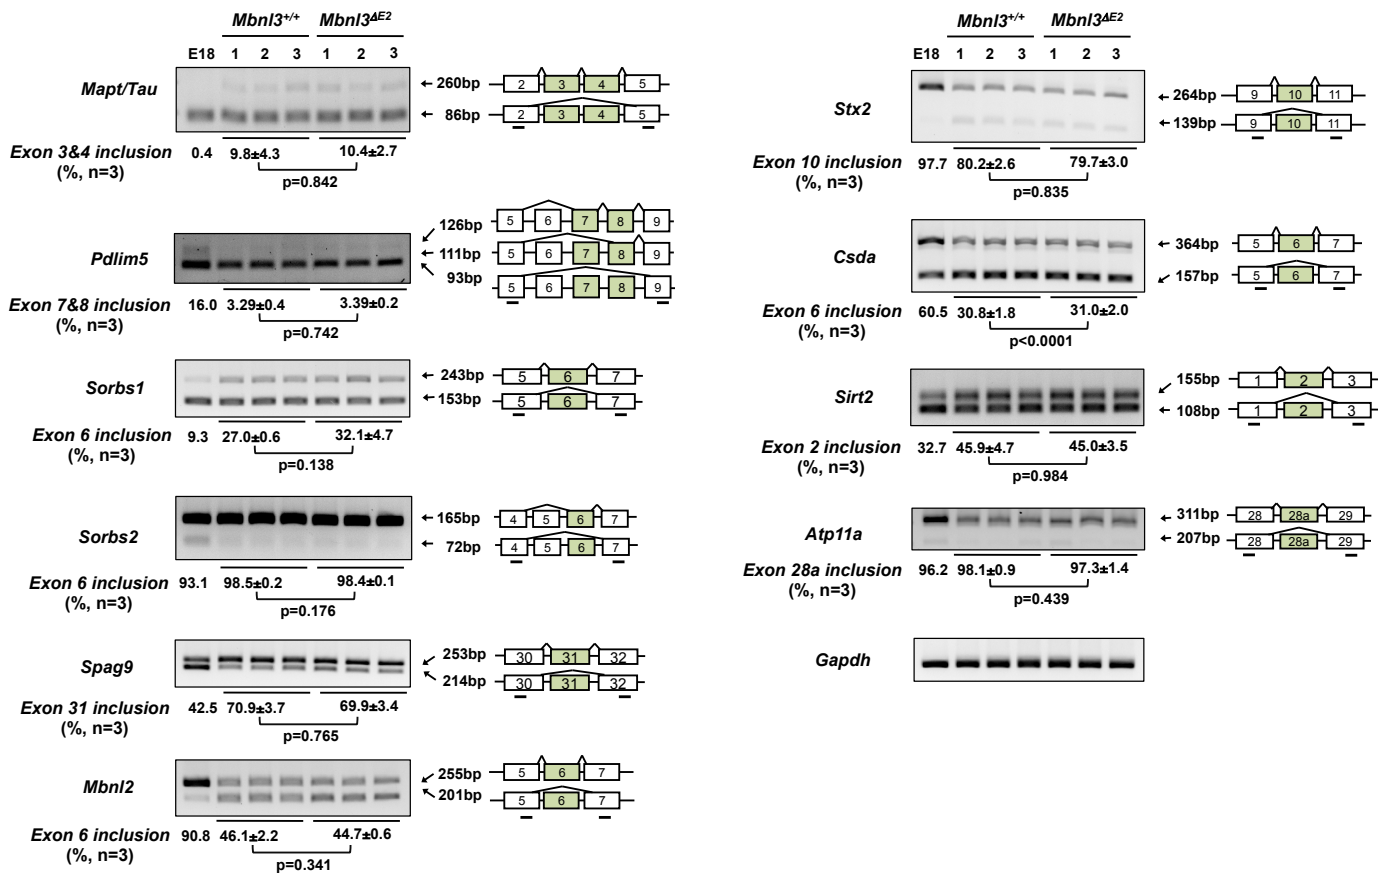

**Table S1**

**a**

| Genotype                   | Gender | Age (months) | n | 0 min        | 10 mins      | 20 mins      | 30 mins      | 60 mins      | 90 mins      | 120 mins     | 180 mins     |
|----------------------------|--------|--------------|---|--------------|--------------|--------------|--------------|--------------|--------------|--------------|--------------|
| <i>Mbn13<sup>+/+</sup></i> | Male   | 4            | 4 | 93.13±22.99  | 164.00±26.75 | 179.88±37.84 | 168.13±37.60 | 123.50±30.18 | 123.38±19.60 | 108.00±21.04 | 88.50±16.69  |
| <i>Mbn13<sup>ΔE2</sup></i> | Male   | 4            | 3 | 101.33±15.67 | 179.67±17.75 | 143.67±45.17 | 126.33±35.11 | 128.50±17.21 | 117.83±23.06 | 123.67±30.15 | 113.20±25.25 |
| p-value                    |        |              |   | 0.468        | 0.239        | 0.128        | 0.056        | 0.732        | 0.636        | 0.273        | 0.083        |

**b**

| Genotype                   | Gender | Age (months) | n | 0 min       | 10 mins      | 20 mins      | 30 mins      | 60 mins      | 90 mins     | 120 mins    | 180 mins    |
|----------------------------|--------|--------------|---|-------------|--------------|--------------|--------------|--------------|-------------|-------------|-------------|
| <i>Mbn13<sup>+/+</sup></i> | Male   | 7-9          | 5 | 74.72±4.87  | 134.64±11.21 | 152.80±4.97  | 99.20±7.27   | 92.09±3.08   | 77.70±4.72  | 76.90±6.74  | 62.20±5.62  |
| <i>Mbn13<sup>ΔE2</sup></i> | Male   | 7-9          | 7 | 111.88±3.33 | 163.13±8.53  | 191.43±14.88 | 178.64±14.88 | 164.72±12.50 | 142.57±7.65 | 130.57±7.46 | 108.40±3.90 |
| p-value                    |        |              |   | *<0.001     | *0.021       | *0.045       | *<0.001      | *<0.001      | *<0.001     | *<0.001     | *<0.001     |

**Table S2**

| <b>Genotype</b>             | <b>Gender</b> | <b>Age (months)</b> | <b>n</b> | <b>0 min</b>  | <b>8 mins</b> | <b>15 mins</b> | <b>30 mins</b> | <b>60 mins</b> | <b>90 mins</b> |
|-----------------------------|---------------|---------------------|----------|---------------|---------------|----------------|----------------|----------------|----------------|
| <i>Mbni3</i> <sup>+/+</sup> | Male          | 8-10                | 4        | 0.74±40.10    | 1.29±0.12     | 1.02±0.09      | 1.08±0.13      | 0.86±0.09      | 0.85±0.06      |
| <i>Mbni3</i> <sup>ΔE2</sup> | Male          | 8-10                | 5        | 1.62±0.21     | 1.78±0.21     | 1.58±0.19      | 1.93±0.20      | 1.76±0.23      | 1.81±0.25      |
| <b>p-value</b>              |               |                     |          | <b>*0.005</b> | 0.275         | <b>*0.013</b>  | <b>*0.048</b>  | <b>*0.014</b>  | <b>*0.008</b>  |

**Table S3**

**a**

| Genotype                   | Gender | Age (weeks) | n | Heart Rate | VST (mm)  | EDD (mm)  | PWT (mm)  | ESD (mm)     | Ao-ET (ms) | Lv%FS        | Vcf          | LvEF         | Lvmass    | E/A       |
|----------------------------|--------|-------------|---|------------|-----------|-----------|-----------|--------------|------------|--------------|--------------|--------------|-----------|-----------|
| <i>Mbn13<sup>+/+</sup></i> | Male   | 17          | 4 | 476±64     | 0.55±0.01 | 4.25±0.10 | 0.54±0.05 | 2.68±0.25    | 54.3±2.1   | 37.0±5.7     | 6.80±0.86    | 73.8±7.7     | 78.1±3.5  | 1.81±0.15 |
| <i>Mbn13<sup>ΔE2</sup></i> | Male   | 17          | 7 | 475±48     | 0.56±0.04 | 4.20±0.23 | 0.50±0.05 | 3.04±0.21    | 52.1±3.4   | 27.5±4.6     | 5.29±0.87    | 59.9±7.8     | 76.0±11.2 | 2.10±0.65 |
| <b>p-value</b>             |        |             |   | 0.97       | 0.64      | 0.72      | 0.3       | <b>*0.03</b> | 0.26       | <b>*0.01</b> | <b>*0.02</b> | <b>*0.02</b> | 0.72      | 0.48      |

**b**

| Genotype                   | Gender | Age (weeks) | n | Heart Rate | VST (mm)     | EDD (mm)     | PWT (mm)      | ESD (mm)  | Ao-ET (ms) | Lv%FS    | Vcf       | LvEF     | Lvmass        | E/A       |
|----------------------------|--------|-------------|---|------------|--------------|--------------|---------------|-----------|------------|----------|-----------|----------|---------------|-----------|
| <i>Mbn13<sup>+/+</sup></i> | Male   | 46          | 4 | 468±50     | 0.46±0.02    | 4.00±0.20    | 0.46±0.01     | 2.85±0.44 | 48.9±4.6   | 29.0±7.8 | 5.98±1.69 | 63.9±9.9 | 58.7±6.9      | 1.50±0.16 |
| <i>Mbn13<sup>ΔE2</sup></i> | Male   | 46          | 6 | 525±38     | 0.53±0.04    | 4.48±0.35    | 0.56±0.05     | 3.37±0.42 | 47.1±8.1   | 24.1±6.0 | 5.19±1.45 | 55.6±9.9 | 88.5±11.2     | 1.79±0.35 |
| <b>p-value</b>             |        |             |   | 0.07       | <b>*0.02</b> | <b>*0.04</b> | <b>*0.003</b> | 0.09      | 0.69       | 0.37     | 0.57      | 0.22     | <b>*0.001</b> | 0.16      |

**Table S4****a**

| Genotype                    | Gender | Age (weeks) | n | PR (ms)  | QRS (ms) | QT (ms)  |
|-----------------------------|--------|-------------|---|----------|----------|----------|
| <i>Mbn13</i> <sup>+/+</sup> | Male   | 17          | 4 | 42.9±2.2 | 8.9±0.8  | 45.8±1.8 |
| <i>Mbn13</i> <sup>ΔE2</sup> | Male   | 17          | 4 | 45.2±2.3 | 8.3±0.2  | 51.0±7.1 |
| p-value                     |        |             |   | 0.198    | 0.199    | 0.228    |

**b**

| Genotype                    | Gender | Age (weeks) | n | PR (ms)  | QRS (ms) | QT (ms)  |
|-----------------------------|--------|-------------|---|----------|----------|----------|
| <i>Mbn13</i> <sup>+/+</sup> | Male   | 46          | 4 | 48.9±3.4 | 10.0±3.4 | 49.9±0.9 |
| <i>Mbn13</i> <sup>ΔE2</sup> | Male   | 46          | 4 | 44.2±1.0 | 9.7±2.2  | 55.8±4.1 |
| p-value                     |        |             |   | 0.085    | 0.908    | 0.068    |

Table S5

| Genotype                    | Gender | Age (months) | n | Scotopic Max ( $\mu\text{V}$ ) |             | Mesopic ( $\mu\text{V}$ ) |              | Photopic ( $\mu\text{V}$ ) |            |           |            |          |            |          |            |                  |
|-----------------------------|--------|--------------|---|--------------------------------|-------------|---------------------------|--------------|----------------------------|------------|-----------|------------|----------|------------|----------|------------|------------------|
|                             |        |              |   | a-wave                         | b-wave      | a-wave                    | b-wave       | 1 min                      |            | 4 min     |            | 7 min    |            | 10 min   |            | 10 Hz<br>Flicker |
|                             |        |              |   |                                |             |                           |              | a-wave                     | b-wave     | a-wave    | b-wave     | a-wave   | b-wave     | a-wave   | b-wave     |                  |
| <i>Mbn13</i> <sup>ΔE2</sup> | Male   | 13           | 4 | 51.8±13.7                      | 640.5±175.1 | 419.0±50.8                | 1065.0±357.9 | 21.3±4.3                   | 288.3±31.7 | 19.5±13.9 | 310.0±77.4 | 23.8±5.4 | 336.8±83.0 | 26.8±8.6 | 350.3±85.0 | 144.5±70.6       |
| <i>Mbn13</i> <sup>+/+</sup> | Male   | 13           | 4 | 36.0±16.1                      | 734.0±204.8 | 370.5±69.1                | 1234.3±249.2 | 18.3±3.2                   | 262.3±68.0 | 21.5±1.7  | 277.0±69.6 | 21.8±3.1 | 287.8±54.8 | 17.8±2.9 | 292.8±65.4 | 109.5±26.9       |
| <b>p-value</b>              |        |              |   | 0.187                          | 0.514       | 0.301                     | 0.467        | 0.371                      | 0.524      | 0.785     | 0.549      | 0.543    | 0.363      | 0.095    | 0.325      | 0.39             |

**Table S6****PCR primers and conditions:****RT-PCR primers****Muscleblind-like protein 3 (*Mbnl3*)**

Forward: 5'-TCCTTGAACCATCTGCAGTCA-3'  
Reverse: 5'-GTGAATCAAACAGGCCACCA-3'

**Insulin receptor (*Insr*)**

Forward: 5'-GAGGATTACCTGCACAACG-3'  
Reverse: 5'-CACAAATGGTAGAGGAGACG-3'

**Cardiac troponin T (*Tnnt2*)**

Forward: 5'-GCCGAGGAGGTGGTGGAGGAGTA-3'  
Reverse: 5'-GTCTCAGCCTCACCTCAGGCTCA-3'

**LIM domain binding protein 3 (*Ldb3*)**

Forward: 5'-GGAAGATGAGGCTGATGAGTGG-3'  
Reverse: 5'-TGCTGACAGTGGTAGTGCTCTTTC-3'

**Muscleblind-like protein 1 (*Mbnl1*)**

Forward: 5'-GCTGCCCAATACCAGGTCAAC-3'  
Reverse: 5'-TGGTGGGAGAAATGCTGTATGC-3'

**PDZ and LIM domain 5 (*Pdlim3/Alp*)**

Forward: 5'- AGC TGC CAA CCT GTG TCC TG -3'  
Reverse: 5'- GAT CCT GCA GCA CCC TGA AG -3

**ATPase, Ca<sup>++</sup> transporting, cardiac muscle, fast twitch 1 (*Atp2a1*)**

Forward: 5'- GCT CAT GGT CCT CAA GAT CTC AC -3'  
Reverse: 5'- GGG TCA GTG CCT CAG CTT TG -3

**Clathrin, light chain A (*Cfta*)**

Forward: 5'- GGC GAT AAA GGA GCT GGA AGA -3'  
Reverse: 5'- AAT GTC GTT TAC AAA GGC TTC -3'

**Cold shock domain protein A/Y-box binding protein 3 (*Csda/Ybx3*)**

Forward: 5'- GGT GCT GAA GCA GCAAAC GT -3'  
Reverse: 5'- GGA CTC CAT CCT TCA TCT CCC C -3'

**PCR Conditions:**

5 MIN AT 95C, [30 SEC AT 95C, 30 SEC AT 60C,  
45 SEC AT 72C X35], 10 MIN AT 72C

5 MIN AT 95C, [30 SEC AT 95C, 30 SEC AT 55C,  
45 SEC AT 72C X35], 10 MIN AT 72C

5 MIN AT 95C, [30 SEC AT 95C, 30 SEC AT 65C,  
45 SEC AT 72C X35], 10 MIN AT 72C

5 MIN AT 95C, [30 SEC AT 95C, 30 SEC AT 60C,  
45 SEC AT 72C X35], 10 MIN AT 72C

5 MIN AT 95C, [30 SEC AT 95C, 30 SEC AT 60C,  
45 SEC AT 72C X35], 10 MIN AT 72C

5 MIN AT 95C, [30 SEC AT 95C, 30 SEC AT 60C,  
45 SEC AT 72C X35], 10 MIN AT 72C

5 MIN AT 95C, [30 SEC AT 95C, 30 SEC AT 60C,  
45 SEC AT 72C X35], 10 MIN AT 72C

5 MIN AT 95C, [30 SEC AT 95C, 30 SEC AT 60C,  
45 SEC AT 72C X35], 10 MIN AT 72C

5 MIN AT 95C, [30 SEC AT 95C, 30 SEC AT 60C,  
45 SEC AT 72C X35], 10 MIN AT 72C



**Table S6 (continued)**

**Continued**  
**RT-PCR primers**

**Muscleblind-like protein 2 (*Mbnl2*)**

Forward: 5'- ACC GTA ACC GTT TGT ATG GAT TAC -3'

Reverse: 5'- CTT TGG TAA GGG ATG AAG AGC AC -3'

**Myomesin 1 (*Myom1*)**

Forward: 5'- CAT GGA CTG ACG ACT GCT CAG AGC -3'

Reverse: 5'- CTG CAT CGC TGA CGG CCT TGA TG -3'

**Sorbin and SH3 domain-containing protein 2 (*Sorbs2*)**

Forward: 5'- CTG AAG AAG TTA ATA ACA AAC CCT TCA AGG TG -3'

Reverse: 5'- CTG AAT CTG GAG ACT GAG ACT CAC G -3'

**Syntaxin 2 (*Stx2*)**

Forward: 5'- GCC AAG GAA GAG ACG AAG AAA GC -3'

Reverse: 5'-GGT ACG GTT GCT ATG ACA ATG CTG -3'

**Tripartite motif containing 55 (*Trim55/Murf-2*)**

Forward: 5'- GGA GAG GAT GCA GTA GAA GTA -3'

Reverse: 5'- CAA CCA GGA GAA GGA GAA GAC -3'

**ATPase , class VI, type 11A (*Atp11a*)**

Forward: 5'- CCG TTC CTC AGT TAC CAG AGG AT -3'

Reverse: 5'- CAG AGG GGT GAA TTC TGA AAT GCT G -3'

**Formin homolog 2 domain containing 1 (*Fhod1*)**

Forward: 5'- CGC CTA CAA ATC CAG CCT TC -3'

Reverse: 5'- TCC CTT GTG CCT GAT GAT CC -3'

**PDZ and LIM domain 5 (*Pdlim5*)**

Forward: 5'- CAG GGT GAC ATT AAG CAG CAA AAT GG -3'

Reverse: 5'- GGC ATC ACT GTG AGT GGG TAT GTG -3'

**Sirtuin 2 (*Sirt2*)**

Forward: 5'- CAG AGC AGT CGG TGA CAG TCC -3'

Reverse: 5'- TCT CTG CCT CTC CAC CAG TG -3'

**PCR Conditions:**

5 MIN AT 95C, [30 SEC AT 95C, 30 SEC AT 60C,  
45 SEC AT 72C X35], 10 MIN AT 72C

5 MIN AT 95C, [30 SEC AT 95C, 30 SEC AT 55C,  
45 SEC AT 72C X35], 10 MIN AT 72C

5 MIN AT 95C, [30 SEC AT 95C, 30 SEC AT 65C,  
45 SEC AT 72C X35], 10 MIN AT 72C

5 MIN AT 95C, [30 SEC AT 95C, 30 SEC AT 60C,  
45 SEC AT 72C X35], 10 MIN AT 72C

5 MIN AT 95C, [30 SEC AT 95C, 30 SEC AT 60C,  
45 SEC AT 72C X35], 10 MIN AT 72C

5 MIN AT 95C, [30 SEC AT 95C, 30 SEC AT 60C,  
45 SEC AT 72C X35], 10 MIN AT 72C

5 MIN AT 95C, [30 SEC AT 95C, 30 SEC AT 60C,  
45 SEC AT 72C X35], 10 MIN AT 72C

5 MIN AT 95C, [30 SEC AT 95C, 30 SEC AT 60C,  
45 SEC AT 72C X35], 10 MIN AT 72C

5 MIN AT 95C, [30 SEC AT 95C, 30 SEC AT 60C,  
45 SEC AT 72C X35], 10 MIN AT 72C

**Continued**

**RT-PCR primers**

**Sorbin and SH3 domain containing 1 (*Sorbs1*)**

Forward: 5'- CTG GCA ACC ATG GAC CAG AC -3'

Reverse: 5'- CTG ACT TGC TTT CAT GCT TCG -3

**C-jun-amino-terminal kinase-interacting protein (*Spag9*)**

Forward: 5'- GGA CTG GAA ATG GTGTCATTA TCT CCA T -3'

Reverse: 5'-ACT GCC ACA AAG AAT TTC ACA G -3'

**Glyceraldehyde-3-phosphate dehydrogenase (*Gapdh*)**

Forward: 5'-AGA GAC GGC CGC CGC ATC TTC TTG TG-3'

Reverse: 5'-TCT GGG TCC CAG TGA TGG CAT GG-3'

**PCR Conditions:**

5 MIN AT 95C, [30 SEC AT 95C, 30 SEC AT 60C,  
45 SEC AT 72C X35], 10 MIN AT 72C

5 MIN AT 95C, [30 SEC AT 95C, 30 SEC AT 55C,  
45 SEC AT 72C X35], 10 MIN AT 72C

5 MIN AT 95C, [30 SEC AT 95C, 30 SEC AT 65C,  
45 SEC AT 72C X35], 10 MIN AT 72C

**Table S6 (continued)**

**PCR primers and conditions:**

**qPCR primers**

**Insulin Receptor (*Insr*) qPCR Exon 9-10**

Forward: 5'-GAGAGGCAAGCAGAGGACAG-3'

Reverse: 5'-ACCAGGTCCGTGAAGGGA-3'

**Insulin Receptor (*Insr*) qPCR Exon 10-10a**

Forward: 5'-TGGTGCCGAGGACAGTAGG-3'

Reverse: 5'-GTGTGGTGGCTGTCACATTC-3'

**LIM domain binding protein 3 (*Ldb3*) qPCR Exon 16-17**

Forward: 5'-CCTGGCATGACACCTGCTT-3'

Reverse: 5'-TGCACAGTGGTTTGTCTTTCTTAG-3'

**LIM domain binding protein 3 (*Ldb3*) qPCR Exon 11-12**

Forward: 5'-GCTCTGCGAAGGTCAAGCA-3'

Reverse: 5'-CGGGCGACTGGGCAGAAG-3'

**Cardiac troponin T (*Tnnt2*) qPCR 3-6**

Forward: 5'-GGAACAGGAAGAGCAAGAGG-3'

Reverse: 5'-CAGGTTCCAGCCCCACCAG-3'

**Cardiac troponin T (*Tnnt2*) qPCR Exon 7-9**

Forward: 5'-GCTGAAGAAGGTCCAGTAGAGG -3'

Reverse: 5'-GCACCAAGTTGGGCATGAAG-3'

**PCR Conditions:**

5 MIN AT 95C, [30 SEC AT 95C, 30 SEC AT 60C,  
30 SEC AT 72C X35], 10 MIN AT 72C

5 MIN AT 95C, [30 SEC AT 95C, 30 SEC AT 60C,  
30 SEC AT 72C X35], 10 MIN AT 72C

5 MIN AT 95C, [30 SEC AT 95C, 30 SEC AT 60C,  
30 SEC AT 72C X35], 10 MIN AT 72C

5 MIN AT 95C, [30 SEC AT 95C, 30 SEC AT 60C,  
30 SEC AT 72C X35], 10 MIN AT 72C

5 MIN AT 95C, [30 SEC AT 95C, 30 SEC AT 65C,  
45 SEC AT 72C X35], 10 MIN AT 72C

5 MIN AT 95C, [30 SEC AT 95C, 30 SEC AT 65C,  
45 SEC AT 72C X35], 10 MIN AT 72C
